# Supplementary material for: Long-Lasting Improvements in Liver Fat and Metabolism Despite Body Weight Regain After Dietary Weight Loss
Source: Oxford University Press journal article supplement (doi:10.2337/dc13-0102), 2013-08-21

# SUPPLEMENTARY DATA

**Supplementary Table 1.** Clinical characteristics of subjects who participated in the follow-up assessment and subjects who discontinued study participation during the follow-up period.

|                                                         | Participants  | Non-Participants |
|---------------------------------------------------------|---------------|------------------|
| n, (female/ male)                                       | 54 (43/11)    | 54 (46/8)        |
| Age, years                                              | 46 ± 9        | 45 ± 10          |
| <i>Anthropometric variables</i>                         |               |                  |
| Body weight at baseline, kg                             | 91.5 ± 13.6   | 93.6 ± 17.9      |
| Δ Body weight after 1-month diet, kg                    | - 1.9 ± 1.8   | - 2.1 ± 2.7      |
| Δ Body weight after 3-month diet, kg                    | - 4.8 ± 3.0   | - 4.9 ± 3.8      |
| Δ Body weight after 6-month diet, kg                    | - 7.2 ± 4.4   | - 6.9 ± 4.6      |
| Body mass index at baseline, kg/m <sup>2</sup>          | 32.5 ± 3.3    | 33.8 ± 4.7       |
| Δ Body mass index after 1-month diet, kg/m <sup>2</sup> | - 0.7 ± 0.7   | - 0.7 ± 1.0      |
| Δ Body mass index after 3-month diet, kg/m <sup>2</sup> | - 1.7 ± 1.1   | - 1.8 ± 1.3      |
| Δ Body mass index after 6-month diet, kg/m <sup>2</sup> | - 2.6 ± 1.5   | - 2.5 ± 1.6      |
| Visceral adipose tissue at baseline, kg                 | 1.87 ± 1.05   | 1.89 ± 1.11      |
| Δ Visceral adipose tissue after 6-month diet, kg        | - 0.45 ± 0.42 | - 0.38 ± 0.43    |
| Intrahepatic lipids at baseline, %                      | 7.9 ± 9.9     | 9.3 ± 9.6        |
| Δ Intrahepatic lipids after 6-month diet, %             | - 3.3 ± 4.7   | - 4.1 ± 5.2      |
| <i>Metabolic variables</i>                              |               |                  |
| Total cholesterol at baseline, mmol/l                   | 4.8 ± 0.9     | 4.9 ± 0.9        |
| Δ Total cholesterol after 3-month diet, mmol/l          | - 0.11 ± 0.56 | - 0.08 ± 0.69    |
| Δ Total cholesterol after 6-month diet, mmol/l          | - 0.32 ± 0.67 | - 0.26 ± 0.71    |
| Triglycerides at baseline, mmol/l                       | 1.1 ± 0.5     | 1.2 ± 0.6        |
| Δ Triglycerides after 3-month diet, mmol/l              | - 0.02 ± 0.56 | - 0.05 ± 0.37    |
| Δ Triglycerides after 6-month diet, mmol/l              | - 0.18 ± 0.44 | - 0.14 ± 0.49    |
| Alanine aminotransferase at baseline, U/l               | 25.1 ± 14.8   | 24.9 ± 13.8      |
| Δ Alanine aminotransferase after 3-month diet, U/l      | - 1.5 ± 12.0  | - 2.2 ± 11.2     |
| Δ Alanine aminotransferase after 6-month diet, U/l      | - 3.9 ± 12.4  | - 5.1 ± 10.9     |
| Aspartate aminotransferase at baseline, U/l             | 30.0 ± 16.9   | 27.1 ± 9.3       |
| Δ Aspartate aminotransferase after 3-month diet, U/l    | - 5.1 ± 15.2  | - 3.0 ± 9.4      |
| Δ Aspartate aminotransferase after 6-month diet, U/l    | - 6.5 ± 12.0  | - 5.2 ± 9.6      |
| HOMA-IR at baseline                                     | 1.66 ± 1.29   | 1.69 ± 1.08      |
| Δ HOMA-IR after 6-month diet                            | - 0.67 ± 1.11 | - 0.47 ± 0.91    |
| 2-hour glucose at baseline, mg/dl                       | 143 ± 29      | 144 ± 24         |
| Δ 2-hour glucose after 6-month diet, mg/dl              | - 11 ± 29     | - 14 ± 33        |

Abbreviations: C-ISI, composite insulin sensitivity index; HOMA-IR, homeostasis model assessment index. Data are given as mean ± SD except for gender distribution. Analysis by a two-sided *Student's t-test* for unpaired samples revealed no differences between subjects that participated or did not participate in the follow-up investigation. Gender distribution between both groups was compared by *Fisher's exact test* and was similar between participants and non-participants.

**Supplementary Figure 1:** Participant flow during the course of study

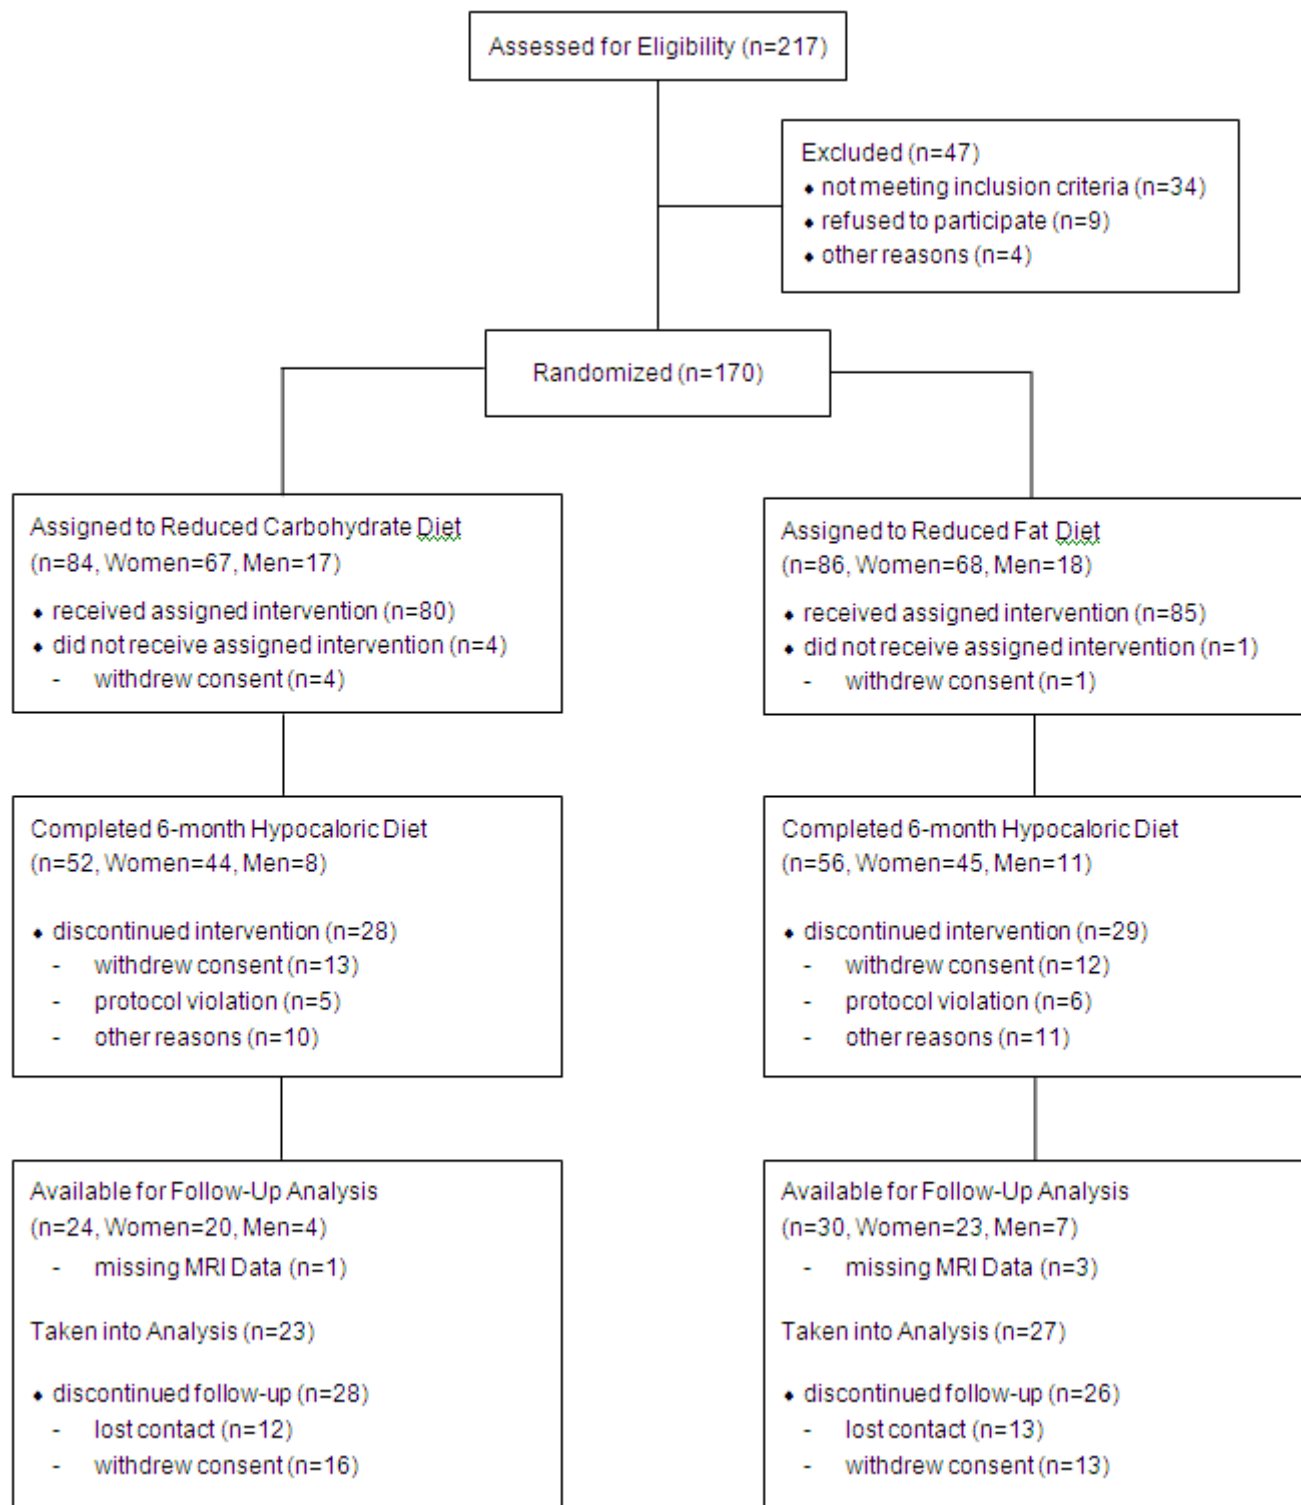

Supplement: dc130102supplementarydata.pdf [file dc130102supplementarydata.pdf]
